# Supplementary material for: Preventive CTLA-4-Ig Treatment Reduces Hepatic Egg Load and Hepatic Fibrosis inSchistosoma mansoni-Infected Mice
Source: Hindawi journal article supplement (doi:10.1155/2019/1704238), 2019-12-16
Supplement: f1 [file 1704238.f1.pdf]

## Supplementary Data Section

### Title

“Preventive CTLA-4-Ig treatment reduces hepatic egg load and hepatic fibrosis in *Schistosoma mansoni* infected mice.”

### Authors

Martina Sombetzki, Anne Rabes, Miriam Bischofsberger, Franziska Winkelmann, Nicole Koslowski, Cindy Schulz, Emil C. Reisinger\*.

### Table of content

- **Supplementary Figure 1:** Representative FACS gating strategy for CD4<sup>+</sup>/CTLA-4<sup>+</sup> cells in spleen homogenates.

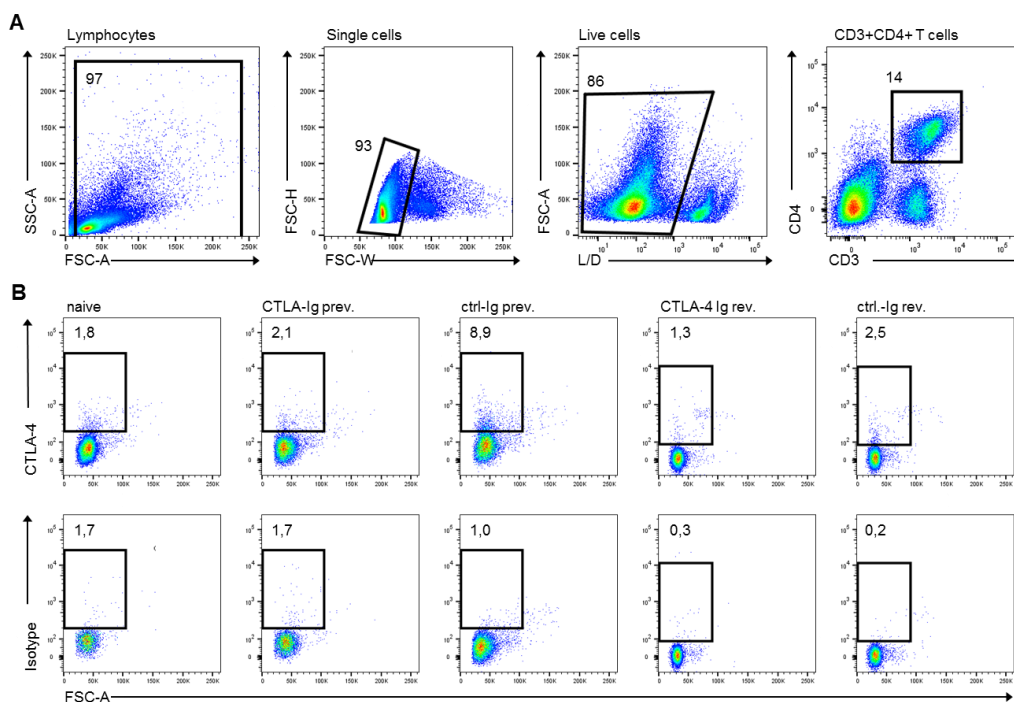

Supplementary Fig. 1: Representative FACS gating strategy for CD4<sup>+</sup>/CTLA-4<sup>+</sup> cells in spleen homogenates. FACS plots: (A) gating of CD4<sup>+</sup> T cells and (B) extracellular staining of CTLA-4 and appropriate control-IG on CD3+CD4<sup>+</sup> T cells.
